# Supplementary material for: In situ delivery of iPSC-derived dendritic cells with local radiotherapy generates systemic antitumor immunity and potentiates PD-L1 blockade in preclinical poorly immunogenic tumor models
Source: PubMed Central journal article supplement — J Immunother Cancer. 2021 May 28;9(5):e002432. doi: 10.1136/jitc-2021-002432 (PMC8166607; doi:10.1136/jitc-2021-002432), 2021-05-28
Supplement: jitc-2021-002432supp002.pdf [file jitc-2021-002432supp002.pdf]

## In situ delivery of iPSC-derived dendritic cells with local radiotherapy generates systemic antitumor immunity and potentiates PD-L1 blockade in preclinical poorly immunogenic tumor models

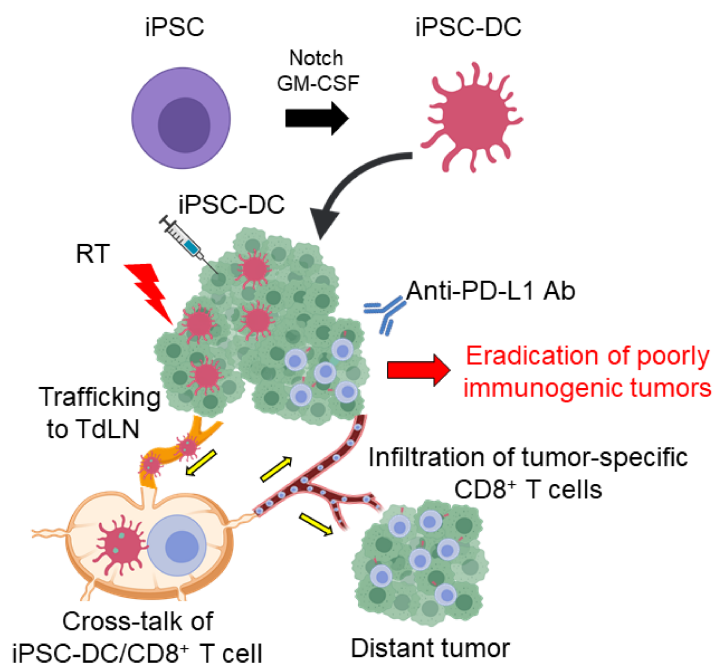

### Authors

Takaaki Oba, Kenichi Makino, Ryutaro Kajihara, Toshihiro Yokoi, Ryoko Araki, Masumi Abe, Hans Minderman, Alfred E. Chang, Kunle Odunsi, and Fumito Ito

### Correspondence

[fumito.ito@roswellpark.org](mailto:fumito.ito@roswellpark.org)

### In brief

Combination of in situ administration of iPSC-derived dendritic cells (iPSC-DC) and radiotherapy (RT) facilitated the priming of tumor-specific CD8<sup>+</sup> T cells, synergistically delayed the growth of not only the treated tumor but also the distant non-irradiated tumors, and rendered poorly immunogenic tumors responsive to anti-PD-L1 therapy along with the development of tumor-specific immunological memory.
